# Supplementary material
Source: Springer Nature journal article supplement (https://www.springermedizin.de/resource/supplementary/12889_2011_3449_MOESM2_ESM.pdf/9489086)
Supplement: MOESM2 [file 9489086]

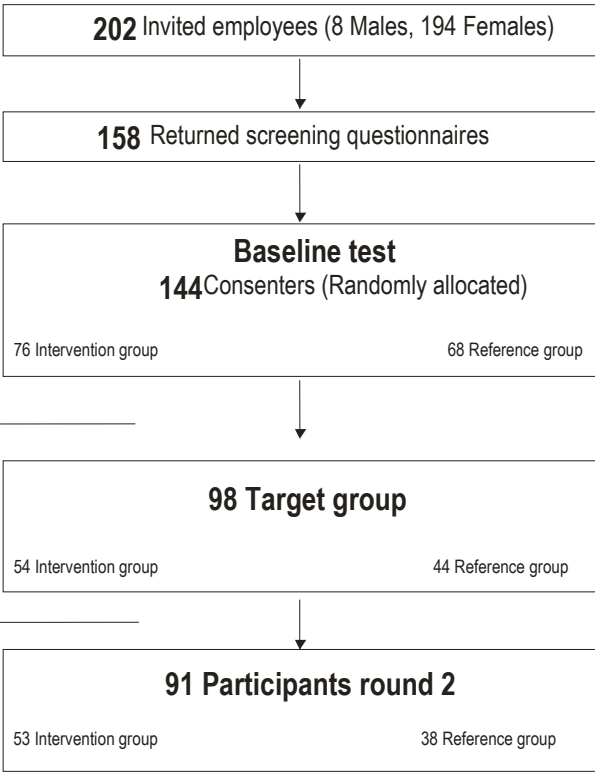

41 Non-consenters  
13 Left the company  
3 long term sick  
1 Pregnant

**46 Excluded from analysis**  
5 Men  
41 Normal Weights

**7 Drop-outs**  
5 Left the company  
2 Long term sick
